# Supplementary material
Source: PubMed Central journal article supplement (PMC3401626)
Supplement: NIHMS340649-supplement-Supplementary_data.pdf [file NIHMS340649-supplement-Supplementary_data.pdf]

## Supporting Information

### **Identification and characterization of inhibitors of the aminoglycoside resistance acetyltransferase Eis from *Mycobacterium tuberculosis***

Keith D. Green,<sup>[a]</sup> Wenjing Chen,<sup>[a,b]</sup> and Sylvie Garneau-Tsodikova,<sup>\*[a,b,c]</sup>

<sup>a</sup> *Life Sciences Institute (210 Washtenaw Ave), University of Michigan, Ann Arbor, MI 48109-2216, U.S.A.*

<sup>b</sup> *Chemical Biology Doctoral Program, University of Michigan, Ann Arbor, MI 48109-2216, U.S.A.*

<sup>c</sup> *Department of Medicinal Chemistry, University of Michigan, Ann Arbor, MI 48109-2216, U.S.A.*

\*E-mail: [sylviegt@umich.edu](mailto:sylviegt@umich.edu)

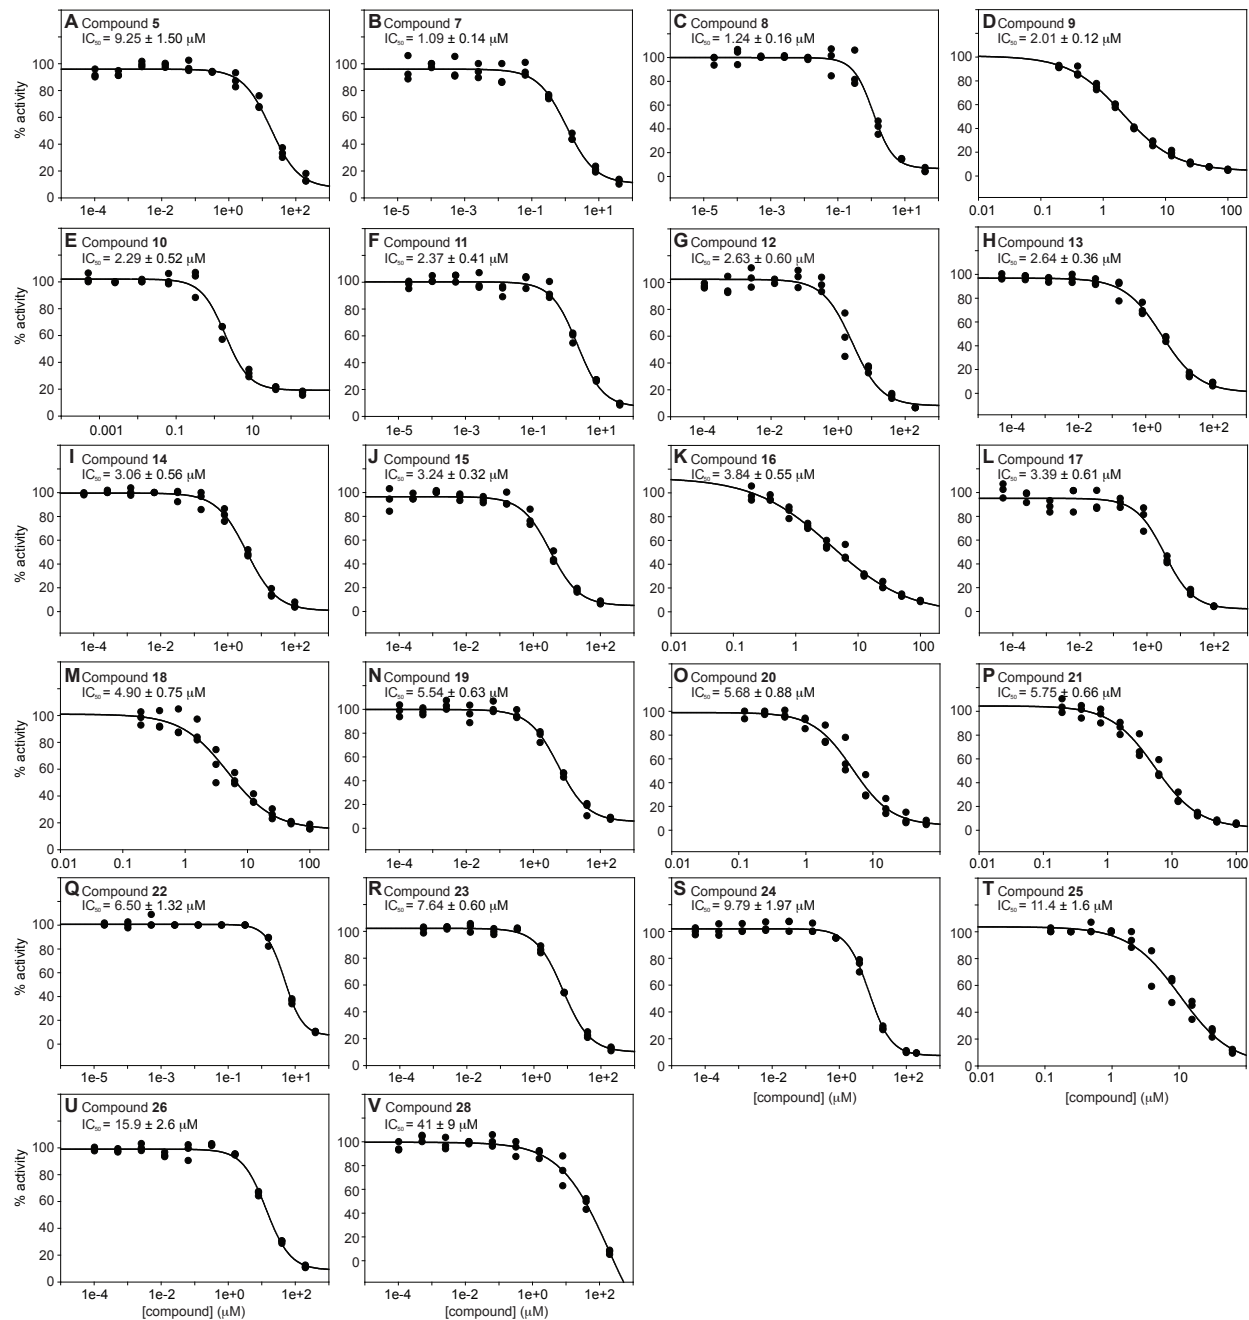

**Fig. S1.**  $\text{IC}_{50}$  curves for compounds 5, 7-26, and 28 determined using NEO. (Note: The  $\text{IC}_{50}$  value for compound 27 was not determined as value was  $>200 \mu\text{M}$ ).

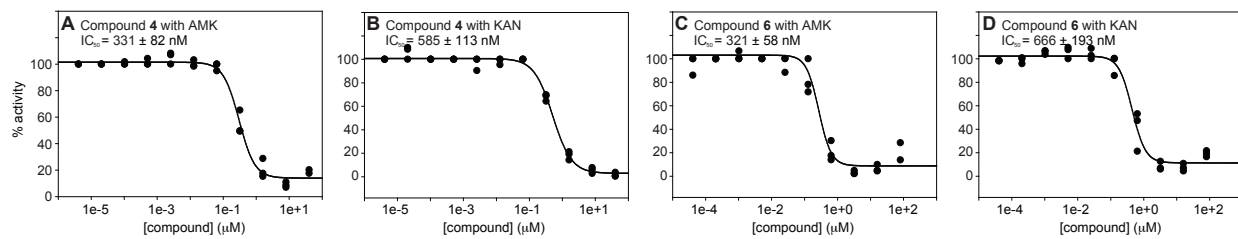

**Fig. S2.** IC<sub>50</sub> curves for compounds 4 and 6 determined using AMK and KAN.
